# Supplementary material for: Volunteering, Health, and Well-being of Children and Adolescents in the United States
Source: PubMed Central journal article supplement (PMC10230312; doi:10.1001/jamanetworkopen.2023.15980), 2023-05-30
Supplement: jamanetwopen-e2315980-s001.pdf [file jamanetwopen-e2315980-s001.pdf]

## Supplemental Online Content

Lanza K, Hunt ET, Mantey DS, Omega-Njemnobi O, Cristol B, Kelder SH.  
Volunteering, health, and well-being of children and adolescents in the United States.  
*JAMA Netw Open.* 2023;6(5):e2315980. doi:10.1001/jamanetworkopen.2023.15980

**eMethods.** Study Variables Developed from 2019-2020 National Survey of Children's Health (NSCH)

This supplemental material has been provided by the authors to give readers additional information about their work.

**eMethods. Study Variables Developed from 2019-2020 National Survey of Children's Health (NSCH)**

*parent-reported survey data for children and adolescents*

**Volunteering:** 0 = no participation in community service or volunteer work in past 12 months, 1 = participation in community service or volunteer work in past 12 months. Developed from NSCH variable volunteer\_1920.

**Excellent/very good health:** 0 = overall health status good, fair, or poor; 1 = overall health status excellent or very good. Developed from NSCH variable k2q01.

**Flourishing:** 0 = does not meet all three flourishing items, 1 = meets all three flourishing items (flourishing items: children who 1) show interest and curiosity in learning new things, 2) work to finish the tasks they start, 3) stay calm and in control when faced with challenges). Developed from NSCH variable flrish6to17\_1920.

**Anxiety:** 0 = no anxiety, 1 = anxiety. Developed from NSCH variable anxiety\_1920.

**Depression:** 0 = no depression, 1 = depression. Developed from NSCH variable depress\_1920.

**Behavioral problems:** 0 = no behavior or conduct problems, 1 = behavior or conduct problems. Developed from NSCH variable behavior\_1920.

**Female:** 0 = male, 1 = female. Developed from NSCH variable sex\_1920.

**Asian:** 0 = not Asian, 1 = Asian (referent = white). Developed from NSCH variable raceASIA\_1920.

**Black:** 0 = not Black, 1 = Black (referent = white). Developed from NSCH variable raceASIA\_1920.

**Hispanic:** 0 = not Hispanic, 1 = Hispanic (referent = white). Developed from NSCH variable raceASIA\_1920.

**Other:** 0 = not American Indian, Alaska Native, Native Hawaiian, other Pacific Islander, or Multi-Racial, 1 = American Indian, Alaska Native, Native Hawaiian, other Pacific Islander, or Multi-Racial, (referent = white). Developed from NSCH variable raceASIA\_1920.

**Household income:** 1 = 0-99% federal poverty level, 2 = 100%-199% federal poverty level, 3 = 200%-399% federal poverty level, 4 = 400% federal poverty level or greater. Developed from NSCH variable povlev4\_1920.

**Parental religiosity:** 0 = parent did not receive day-to-day emotional support from a place of worship/religious leader, 1 = parent did receive day-to-day emotional support from a place of worship/religious leader. Developed from NSCH variable EmSWorship\_1920.

**Urbanicity:** 0 = not metropolitan statistical area, 1 = metropolitan statistical area. Developed from NSCH variable metro\_yn.
