# Supplementary material for: Volunteering, Health, and Well-being of Children and Adolescents in the United States
Source: PubMed Central journal article supplement (PMC10230312; doi:10.1001/jamanetworkopen.2023.15980), 2023-05-30
Supplement: jamanetwopen-e2315980-s002.pdf [file jamanetwopen-e2315980-s002.pdf]

## Data Sharing Statement

Lanza. Volunteering, Health, and Well-being of Children and Adolescents in the United States. *JAMA Netw Open*. Published May 30, 2023. doi:10.1001/jamanetworkopen.2023.15980

### Data

**Data available:** Yes

**Data types:** Deidentified participant data, Data dictionary

**How to access data:** Data are available by request from Kevin Lanza ([Kevin.L.Lanza@uth.tmc.edu](mailto:Kevin.L.Lanza@uth.tmc.edu)).

**When available:** With publication

### Supporting Documents

**Document types:** Statistical/analytic code

**How to access documents:** Analytic code is available by request from Kevin Lanza ([Kevin.L.Lanza@uth.tmc.edu](mailto:Kevin.L.Lanza@uth.tmc.edu)).

**When available:** With publication

### Additional Information

**Who can access the data:** Data will be made available for anyone requesting the data.

**Types of analyses:** Data will be made available for any analytical purpose.

**Mechanisms of data availability:** The data will be made available without investigator support.
